# Supplementary material for: Population Parameters and Growth of Riptortus pedestris (Fabricius) (Hemiptera: Alydidae) under Fluctuating Temperature
Source: MDPI journal article supplement (doi:10.3390/insects13020113), 2022-01-21
Supplement: s1 [file s1]

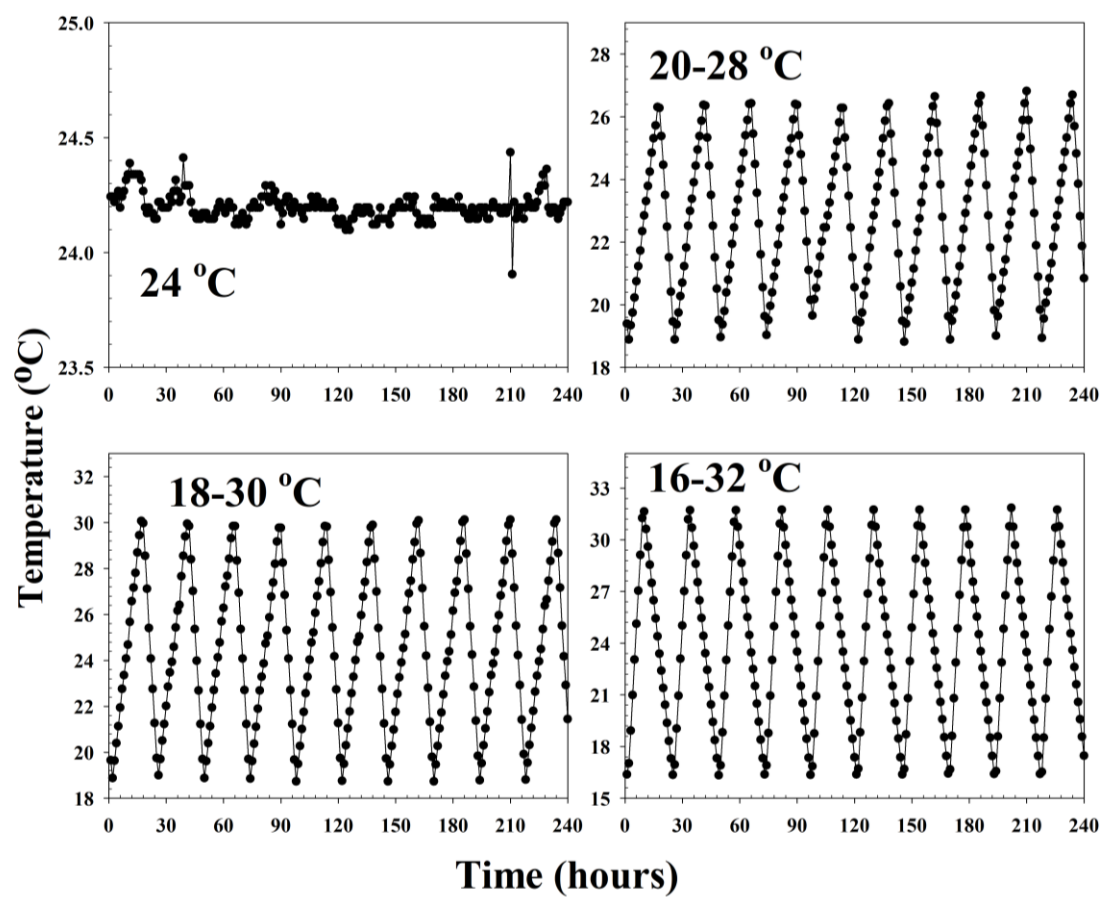

Figure S1. Stepwise process used in temperature cabinets for constant and fluctuating temperature regimes.
